# Supplementary material
Source: PubMed Central journal article supplement (PMC3431634)
Supplement: supp_M112.347484_jbc.M112.347484-1.pdf [file supp_M112.347484_jbc.M112.347484-1.pdf]

Supplementary Material for

Tetrameric structure of GlfT2 reveals a scaffold for the assembly of mycobacterial arabinogalactan

**Robert W. Wheatley,<sup>1,2</sup> Ruixiang Blake Zheng,<sup>1,3</sup> Michele R. Richards,<sup>1,3</sup>  
Todd L. Lowary\*<sup>1,3</sup> and Kenneth K. S. Ng\*<sup>1,2</sup>**

<sup>1</sup>Alberta Glycomics Centre

<sup>2</sup>Department of Biological Sciences University of Calgary, Calgary AB, T2N 1N4, Canada

<sup>3</sup>Department of Chemistry, Gunning-Lemieux Chemistry Centre University of Alberta,  
Edmonton AB, T6G 2G2, Canada

Email: [ngk@ucalgary.ca](mailto:ngk@ucalgary.ca), [tlowary@ualberta.ca](mailto:tlowary@ualberta.ca)

## SUPPLEMENTARY TABLE 1.

### Oligonucleotide Primer Sequences Used for Site-Directed Mutagenesis

|              |           |                                                       |
|--------------|-----------|-------------------------------------------------------|
| <b>E300S</b> | Sense     | GCCATCTGCACATCATGGGTT <u>C</u> AGTTGTCGACCGTTCTA      |
|              | Antisense | TAGAACGGTCGACAAC <u>TGA</u> ACCCATGATGTGCAGATGGC      |
| <b>D371S</b> | Sense     | GCCGCTGTTTATTAAATGG <u>AG</u> CGATGCCGATTATGGTCTG     |
|              | Antisense | CAGACCATAATCGGCATCG <u>C</u> TCCATTTAATAAACAGCGGC     |
| <b>D372S</b> | Sense     | CGCTGTTTATTAAATGGGACT <u>T</u> CTGCCGATTATGGTCTGCGTG  |
|              | Antisense | CACGCAGACCATAATCGGCAG <u>A</u> GTCCCATTTAATAAACAGCG   |
| <b>W399S</b> | Sense     | CTGGCACATGGCGT <u>C</u> GTCTGACAAAGACG                |
|              | Antisense | CGTCTTTGTCAGAC <u>G</u> ACGCCATGTGCCAG                |
| <b>H413S</b> | Sense     | GATGCAATTGATTGGCAGGCTTATTTTT <u>T</u> CTCTGCGTAACCGCC |
|              | Antisense | GGCGGTTACGCAGAG <u>A</u> AAAAATAAGCCTGCCAATCAATTGCATC |

## SUPPLEMENTARY FIGURE LEGENDS

**Supplementary Figure 1.** Topology diagram of GlfT2 showing how secondary structure elements in different domains (colored as in Fig. 1) are connected to each other. Residue numbers for secondary structure elements are given in the table at right.

**Supplementary Figure 2.** Schematic diagram showing conserved residues in different domains forming inter-domain interactions. The numbers in blue indicate the %-age of sequences showing either perfect identity (or in a few cases identity among a few related residue types, as noted) in an alignment of 150 of the unique sequences currently found in the non-redundant subset of Genbank and aligned using CLUSTALW<sup>1</sup>.

**Supplementary Figure 3.** Hypothetical model of UDP-Galf (red) and  $\beta$ -D-Galf-(1 $\rightarrow$ 5)- $\beta$ -D-Galf-(1 $\rightarrow$ 4)- $\alpha$ -L-Rhap-(1 $\rightarrow$ 3)- $\alpha$ -D-GlcNAc-decaprenyl-pyrophosphate bound to the GlfT2 tetramer, with domains for subunit 1 colored as in Fig. 1. Different parts of the lipid-linked acceptor are colored as follows: Galf residues magenta, Rha and GlcNAc cyan, pyrophosphate orange and decaprenol black. The approximate location of the junction between the hydrophilic and hydrophobic portions of the membrane is denoted by blue spheres, as calculated by the PPM server<sup>2</sup>. (A) Stereoscopic view of the model with GlfT2 drawn in a semi-transparent surface representation. (B) Semi-transparent cartoon representation of GlfT2. The side chains of exposed hydrophobic and positively charged residues in domains 3 and 4 of GlfT2 are drawn in stick representation and labeled.

**Supplementary Movie 1.** Animation in which an electrostatic surface representation of the unliganded GlfT2 tetramer is rotated between the N-face, side and C-face views.

**Supplementary Movie 2.** Animation in which a semi-transparent electrostatic surface representation of the GlfT2 tetramer bound to models of UDP-Galf (green spheres) and a lipid-linked tetrasaccharide (Galf disaccharide colored magenta, Rha-GlcNAc disaccharide colored cyan, pyrophosphate colored orange and decaprenol colored black) acceptor is rotated between the N-face, side and C-face views.

## REFERENCES

1. Larkin, M.A. et al. Clustal W and Clustal X version 2.0. *Bioinformatics* 23, 2947-8 (2007).
2. Lomize, M.A., Pogozheva, I.D., Joo, H., Mosberg, H.I. & Lomize, A.L. OPM database and PPM web server: resources for positioning of proteins in membranes. *Nucleic Acids Res.* 40, D370-6 (2012).

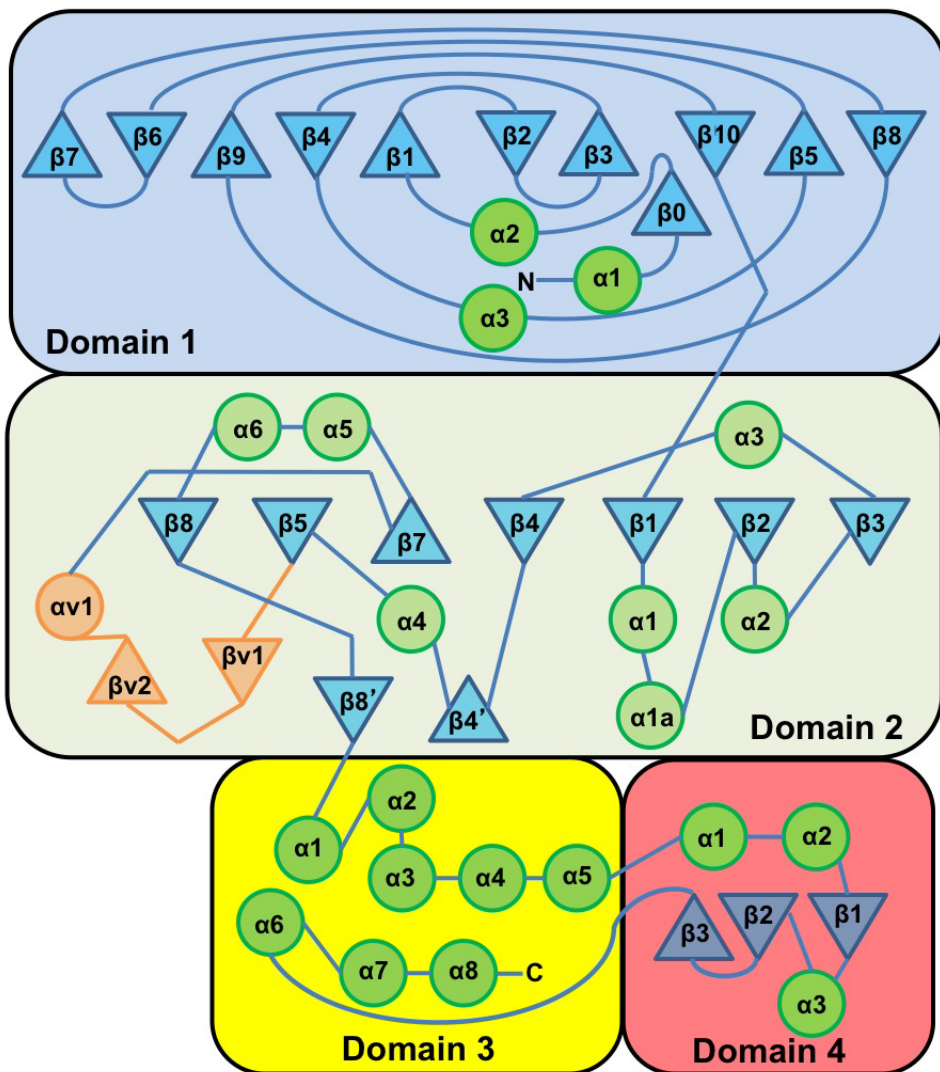

| Domain 1   |         | Domain 2    |         |
|------------|---------|-------------|---------|
| $\alpha 1$ | 2-6     | $\beta 1$   | 162-165 |
| $\beta 0$  | 8-11    | $\alpha 1$  | 172-182 |
| $\alpha 2$ | 21-25   | $\alpha 1a$ | 186-190 |
| $\beta 1$  | 29-30   | $\beta 2$   | 192-199 |
| $\beta 2$  | 39-42   | $\alpha 2$  | 210-218 |
| $\beta 3$  | 45-48   | $\beta 3$   | 222-226 |
| $\beta 4$  | 52-55   | $\alpha 3$  | 230-246 |
| $\alpha 3$ | 65-71   | $\beta 4$   | 251-254 |
| $\beta 5$  | 76-84   | $\beta 4'$  | 259-261 |
| $\beta 6$  | 88-94   | $\alpha 4$  | 263-275 |
| $\beta 7$  | 100-110 | $\beta 5$   | 281-288 |
| $\beta 8$  | 116-123 | $\beta v1$  | 294-297 |
| $\beta 9$  | 132-139 | $\beta v2$  | 300-303 |
| $\beta 10$ | 143-151 | $\alpha v1$ | 331-337 |
|            |         | $\beta 7$   | 350-353 |
|            |         | $\alpha 5$  | 354-360 |
|            |         | $\alpha 6$  | 371-382 |
|            |         | $\beta 8$   | 386-390 |
|            |         | $\beta 8'$  | 392-396 |
| Domain 3   |         | Domain 4    |         |
| $\alpha 1$ | 408-423 | $\alpha 1$  | 518-532 |
| $\alpha 2$ | 431-449 | $\alpha 2$  | 538-542 |
| $\alpha 3$ | 452-467 | $\beta 1$   | 546-548 |
| $\alpha 4$ | 469-475 | $\alpha 3$  | 555-559 |
| $\alpha 5$ | 478-488 | $\beta 2$   | 563-567 |
| $\alpha 6$ | 581-600 | $\beta 3$   | 574-578 |
| $\alpha 7$ | 602-616 |             |         |
| $\alpha 8$ | 619-626 |             |         |

Supplementary Figure 1

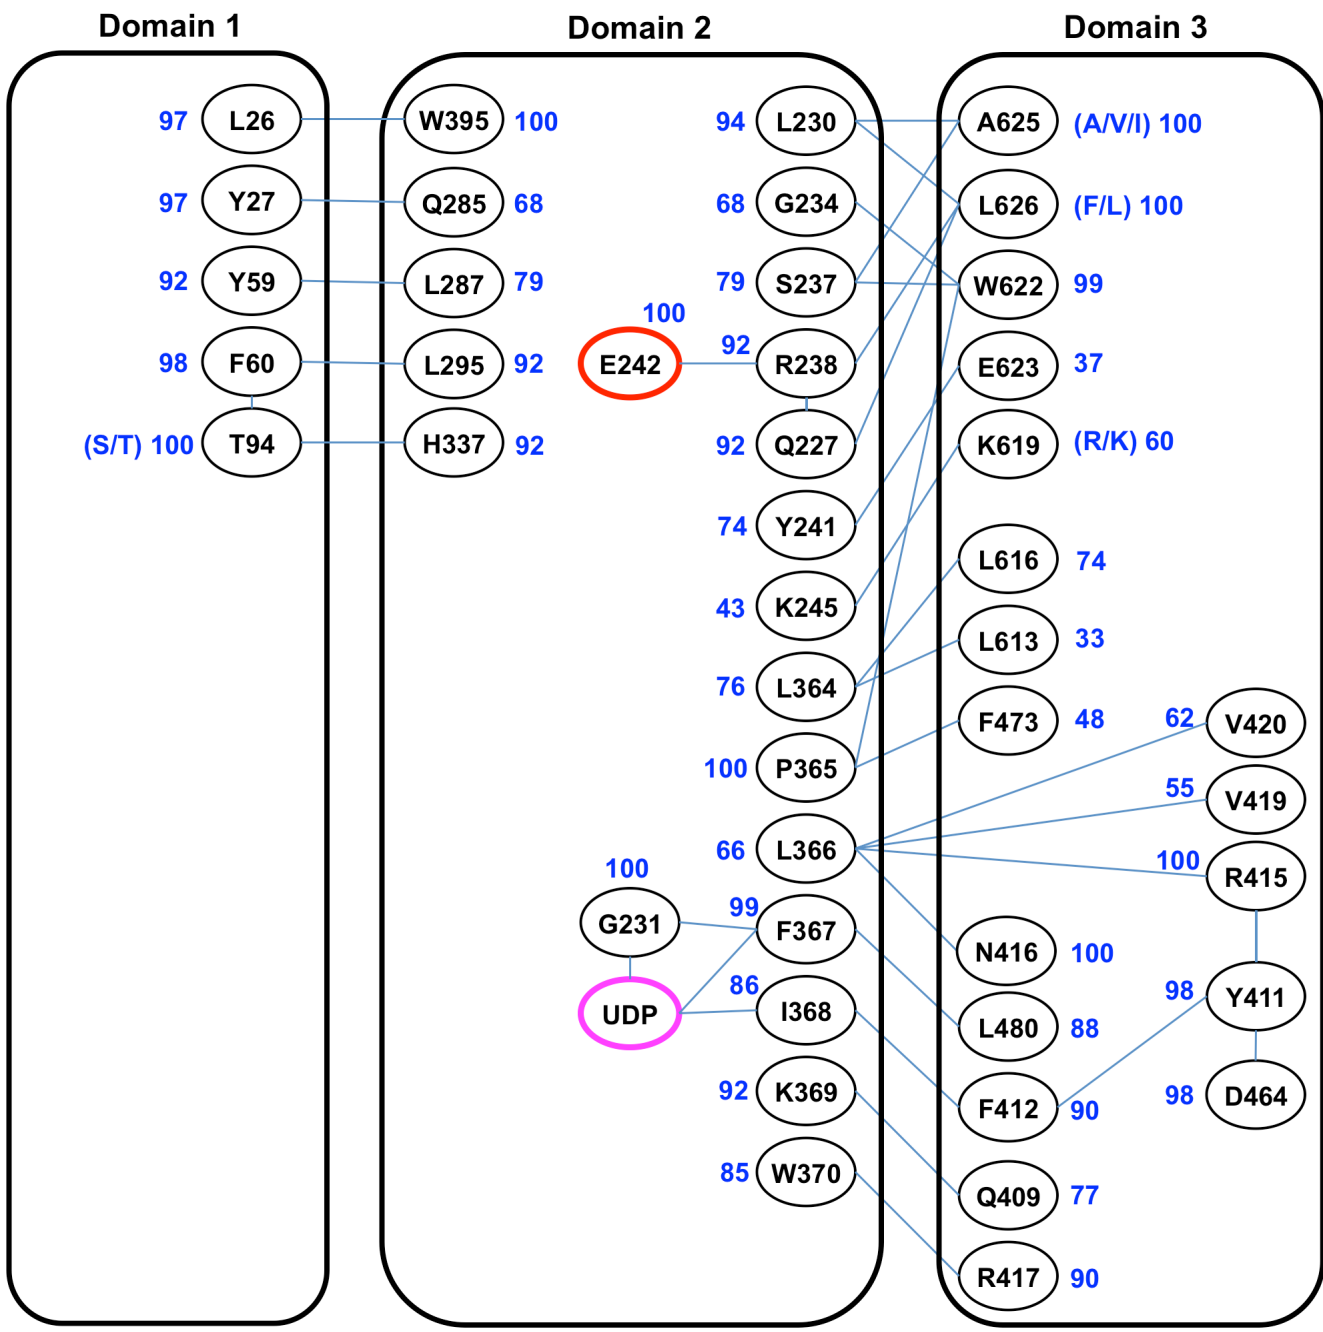

Supplementary Figure 2

A

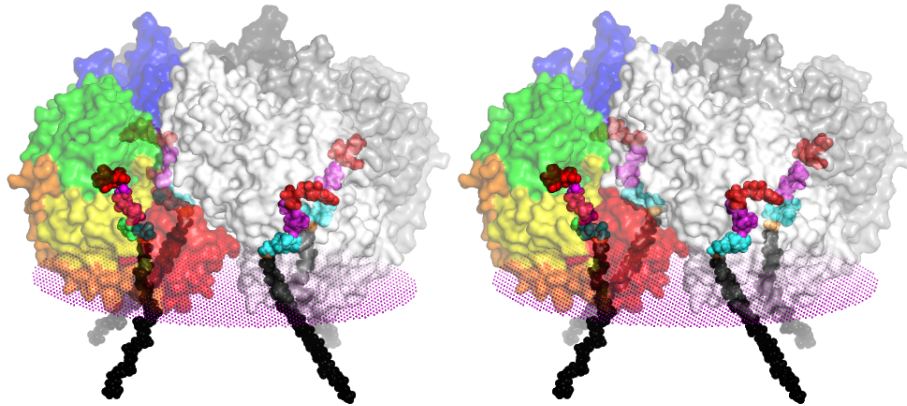

B

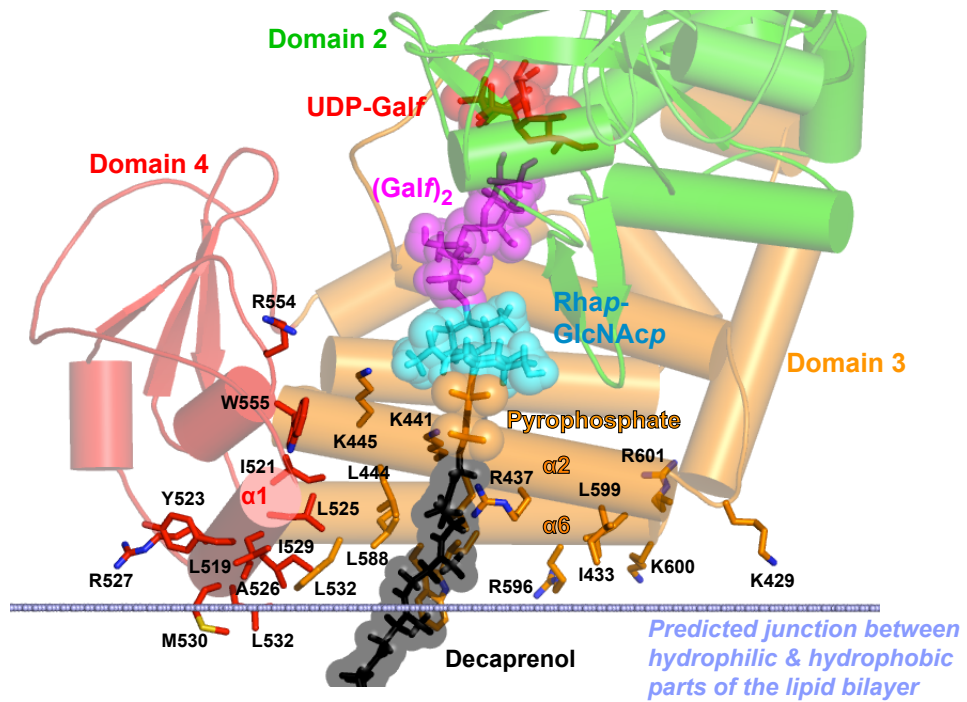

Supplementary Figure 3
